# Supplementary material
Source: publisher figshare collection journal article supplement (https://brill.figshare.com/ndownloader/files/33961673)
Supplement: Supplementary file 1 [file 33961673]

## Sheet: Table S1
Species	Locality	Lat GD	Long GD
Raysymmela bruchi LT	Argentina - Tucuman	-27	-65.5
Raysymmela bruchi	Argentina - Tucuman - S P Colalao	-26.2333	-65.4833
Raysymmela bruchi	Argentina - Jujuy - Capital	-24.1833	-65.3
Raysymmela bruchi	Argentina - Jujuy - El Carmen	-24.3875	-65.2592
Raysymmela bruchi	Bolivia - Cochabamba - Hotel el Puente	-16.9789	-65.4192
Raysymmela costaricensis LT	Costa Rica - Turrialba	10.03	-83.77
Raysymmela costaricensis	Costa Rica - Palo Verde - Colmeco	10.3333	-85.3333
Raysymmela equatorialis HT	Equador - Guayaquil	-2.37608	-80.3377
Raysymmela huanuca HT	Peru - Huanuco	-9.92944	-76.2381
Raysymmela huanuca	Peru - Huanuco - Tingo Maria NP	-9.377	-75.998
Raysymmela pallipes LT	Bolivia - Chiquitos	-16	-60.5
Raysymmela boliviensis LT	Bolivia - Coroico	-16.1833	-67.7333
Raysymmela pallipes	Peru - Madre de Dios - Rio Tambopata Reserve - 30km SW Puerto Maldonado	-12.9206	-69.2819
Raysymmela pallipes	Bolivia - Santa Cruz - Yapacani	-17.4028	-63.885
Raysymmela pallipes	Bolivia - Santa Cruz - Ichilo - Buenavista	-17.4589	-63.6592
Raysymmela pallipes	Bolivia - Chapare - Villa Tunari	-16.9747	-65.4203
Raysymmela pallipes	Bolivia - Region Chapare	-16.8333	-66.1667
Raysymmela seticollis LT	Brasil - Mato Grosso	-15.5833	-56.0833
Raysymmela seticollis	Brasil - AL - Olho dagua do Casado - Xingó	-9.53611	-37.2939
Raysymmela varians	Peru - Marcapata	-13.5897	-70.9764
Raysymmela varians	Peru - Huanuco - 10 mi SW Las Palmas	-9.349	-75.9809
Raysymmela varians	Peru - Ayacuccho - La Mar - Santa Rosa	-12.6877	-73.7459
Raysymmela varians	Peru - Junin - Pampa Hermosa	-11.0367	-75.4806
Raysymmela varians	Peru - Huanuco - Cueva de las Luchuzas	-9.32917	-76.0269
